# Supplementary material
Source: PubMed Central journal article supplement (PMC3883849)
Supplement: supp_130901_fracture-devereaux-3-at.pdf [file supp_130901_fracture-devereaux-3-at.pdf]

### **Appendix 3 (as supplied by the authors): Patients receiving warfarin prior to randomization**

Three patients randomized to accelerated care were on warfarin at the time of their hip fracture. The hospital pharmacist did not release Octaplex for the first patient because they were unaware that the trial was covering the cost of Octaplex. This patient received vitamin K and the time from diagnosis to surgery was 12.8 hours. This patient suffered a pulmonary embolism on day 12 after randomization. The other 2 patients received Octaplex and their mean time from diagnosis to surgery was 8.4 hours; neither suffered a major perioperative complication. Three patients randomized to standard care were on warfarin. They all received vitamin K, and their mean time from diagnosis to surgery was 34.2 hours. Two of these patients suffered a myocardial injury after noncardiac surgery (i.e., one on day 3 after surgery and one on day 4 after surgery).
